# Supplementary material for: Well-Being, Mental Health, and Study Characteristics of Medical Students before and during the Pandemic
Source: MDPI journal article supplement (doi:10.3390/bs14010007), 2023-12-21
Supplement: s1 [file s1]

**Table S1.** Differences in the cross sectional sample.

| Variable | Sample size<br>pre (N) | Sample size<br>peri (N) | T-value | p-value | Mean<br>pre | SD<br>pre | Mean<br>peri | SD<br>peri | Scale range |
|----------|------------------------|-------------------------|---------|---------|-------------|-----------|--------------|------------|-------------|
| PWB      | 373                    | 376                     | 1.74    | .082    | 3.95        | .42       | 3.90         | .42        | 1-5         |
| SWB      | 373                    | 376                     | .65     | .517    | 3.88        | .71       | 3.85         | .75        | 1-5         |
| CIT      | 373                    | 376                     | 1.54    | .125    | 3.94        | .44       | 3.89         | .45        | 1-5         |
| EE       | 384                    | 360                     | 3.62    | <.001   | 2.87        | 1.09      | 2.59         | 1.02       | 0-6         |
| SA       | 400                    | 369                     | -.25    | .807    | 3.88        | .64       | 3.89         | .62        | 1-5         |
| CD       | 400                    | 369                     | 3.15    | .002    | 4.10        | .74       | 3.93         | .75        | 1-5         |
| FBL      | 400                    | 369                     | .71     | .476    | 2.32        | .93       | 2.27         | .91        | 1-5         |
| AUT      | 400                    | 369                     | -1.25   | .213    | 3.62        | .94       | 3.69         | .77        | 1-5         |
| PT       | 400                    | 369                     | -1.80   | .072    | 1.74        | .80       | 1.84         | .75        | 1-5         |
| OS       | 400                    | 369                     | 5.60    | <.001   | 2.92        | .82       | 2.60         | .78        | 1-5         |
| WO       | 400                    | 369                     | 7.17    | <.001   | 3.37        | .95       | 2.90         | .87        | 1-5         |
| IP       | 400                    | 369                     | 3.66    | <.001   | 2.92        | .99       | 2.66         | .94        | 1-5         |
| SSL      | 400                    | 368                     | -3.97   | <.001   | 2.54        | .84       | 2.77         | .80        | 1-5         |
| SSC      | 400                    | 368                     | .76     | .449    | 4.17        | .68       | 4.13         | .72        | 1-5         |
| SSP      | 400                    | 368                     | .40     | .689    | 4.35        | .75       | 4.33         | .72        | 1-5         |
| SST      | 400                    | 368                     | -2.31   | .021    | 3.35        | .57       | 3.45         | .61        | 1-5         |
| SS       | 492                    | 360                     | -3.44   | .001    | 3.66        | .59       | 3.81         | .61        | 1-5         |

PWB = psychological well-being, SWB = subjective well-being, CIT = thriving, EE = emotional exhaustion, SA = skill adequacy, CD = cognitive demands, FBL = feedback of lecturers, AUT = autonomy, PT = participation, OS = organizational stressors, WO = work overload, IP = information problems, SSL = social support of lecturers, SSC = social support of colleagues, SSP = social support private, SST = social support total, SS = study satisfaction

**Table S2.** Differences in the cross sectional sample, divided by sex.

| Men      |                        |                         |             |             |             |           |              |            |                | Women    |                        |                         |             |             |             |           |              |            |                |
|----------|------------------------|-------------------------|-------------|-------------|-------------|-----------|--------------|------------|----------------|----------|------------------------|-------------------------|-------------|-------------|-------------|-----------|--------------|------------|----------------|
| Variable | Sample size<br>pre (N) | Sample size<br>peri (N) | T-<br>value | p-<br>value | Mean<br>pre | SD<br>pre | Mean<br>peri | SD<br>peri | Scale<br>range | Variable | Sample size<br>pre (N) | Sample size<br>peri (N) | T-<br>value | p-<br>value | Mean<br>pre | SD<br>pre | Mean<br>peri | SD<br>peri | Scale<br>range |
| PWB      | 156                    | 149                     | -.01        | .994        | 3.94        | .42       | 3.94         | .40        | 1-5            | PWB      | 217                    | 227                     | 2.21        | .028        | 3.95        | .42       | 3.86         | .42        | 1-5            |
| SWB      | 156                    | 149                     | -.32        | .749        | 3.90        | .70       | 3.92         | .74        | 1-5            | SWB      | 217                    | 227                     | 1.06        | .291        | 3.87        | .72       | 3.80         | .75        | 1-5            |
| CIT      | 156                    | 149                     | -.09        | .925        | 3.94        | .44       | 3.94         | .44        | 1-5            | CIT      | 217                    | 227                     | 2.01        | .045        | 3.94        | .45       | 3.85         | .45        | 1-5            |
| EE       | 157                    | 144                     | 3.24        | .001        | 2.92        | 1.13      | 2.51         | 1.07       | 0-6            | EE       | 227                    | 216                     | 1.96        | .050        | 2.84        | 1.06      | 2.64         | .98        | 0-6            |
| SA       | 162                    | 148                     | -1.18       | .238        | 3.91        | .65       | 3.99         | .62        | 1-5            | SA       | 238                    | 221                     | .66         | .508        | 3.87        | .64       | 3.83         | .61        | 1-5            |
| CD       | 162                    | 148                     | 2.51        | .013        | 4.05        | .73       | 3.83         | .79        | 1-5            | CD       | 238                    | 221                     | 2.03        | .043        | 4.14        | .74       | 4.00         | .71        | 1-5            |
| FBL      | 162                    | 148                     | -.13        | .897        | 2.37        | 1.00      | 2.38         | .95        | 1-5            | FBL      | 238                    | 221                     | 1.07        | .284        | 2.28        | .89       | 2.20         | .87        | 1-5            |
| AUT      | 162                    | 148                     | -1.70       | .090        | 3.59        | .92       | 3.76         | .82        | 1-5            | AUT      | 238                    | 221                     | -.20        | .841        | 3.63        | .95       | 3.65         | .74        | 1-5            |
| PT       | 162                    | 148                     | -2.41       | .016        | 1.73        | .81       | 1.96         | .85        | 1-5            | PT       | 238                    | 221                     | -.24        | .809        | 1.75        | .80       | 1.76         | .67        | 1-5            |
| OS       | 162                    | 148                     | 4.61        | < .001      | 3.00        | .79       | 2.59         | .78        | 1-5            | OS       | 238                    | 221                     | 3.48        | .001        | 2.87        | .84       | 2.61         | .77        | 1-5            |
| WO       | 162                    | 148                     | 4.48        | < .001      | 3.31        | .98       | 2.83         | .89        | 1-5            | WO       | 238                    | 221                     | 5.60        | <.001       | 3.41        | .93       | 2.95         | .85        | 1-5            |
| IP       | 162                    | 148                     | 1.63        | .105        | 2.90        | 1.01      | 2.72         | .97        | 1-5            | IP       | 238                    | 221                     | 3.42        | .001        | 2.93        | .98       | 2.63         | .93        | 1-5            |
| SSL      | 162                    | 148                     | -2.94       | .004        | 2.56        | .85       | 2.85         | .84        | 1-5            | SSL      | 238                    | 220                     | -2.71       | .007        | 2.52        | .83       | 2.72         | .77        | 1-5            |
| SSC      | 162                    | 148                     | .35         | .728        | 4.14        | .65       | 4.11         | .74        | 1-5            | SSC      | 238                    | 220                     | .70         | .487        | 4.18        | .70       | 4.14         | .71        | 1-5            |
| SSP      | 162                    | 148                     | -.01        | .991        | 4.25        | .79       | 4.25         | .73        | 1-5            | SSP      | 238                    | 220                     | .56         | .577        | 4.42        | .71       | 4.38         | .70        | 1-5            |
| SST      | 162                    | 148                     | -1.83       | .068        | 3.35        | .58       | 3.48         | .65        | 1-5            | SST      | 238                    | 220                     | -1.47       | .143        | 3.35        | .57       | 3.43         | .58        | 1-5            |
| SS       | 187                    | 144                     | -3.03       | .003        | 3.65        | .64       | 3.86         | .63        | 1-5            | SS       | 305                    | 216                     | -1.89       | .060        | 3.67        | .56       | 3.77         | .59        | 1-5            |

PWB = psychological well-being, SWB = subjective well-being, CIT = thriving, EE = emotional exhaustion, SA = skill adequacy, CD = cognitive demands, FBL = feedback of lecturers, AUT = autonomy, PT = participation, OS = organizational stressors, WO = work overload, IP = information problems, SSL = social support of lecturers, SSC = social support of colleagues, SSP = social support private, SST = social support total, SS = study satisfaction

**Table S3.** Differences in the cross sectional sample, divided by study years.

|                   | Variable | Sample size<br>pre (N) | Sample size<br>peri (N) | T-value | p-value | Mean<br>pre | SD<br>pre | Mean<br>peri | SD<br>peri | Scale<br>range |
|-------------------|----------|------------------------|-------------------------|---------|---------|-------------|-----------|--------------|------------|----------------|
| <b>Year<br/>1</b> | PWB      | 216                    | 130                     | 1.41    | .159    | 3.99        | .41       | 3.92         | .41        | 1-5            |
|                   | SWB      | 216                    | 130                     | 1.70    | .090    | 3.92        | .67       | 3.79         | .73        | 1-5            |
|                   | CIT      | 216                    | 130                     | 1.56    | .120    | 3.98        | .43       | 3.90         | .44        | 1-5            |
|                   | EE       | 220                    | 124                     | 2.19    | .029    | 2.75        | 1.04      | 2.50         | 1.01       | 0-6            |
|                   | SA       | 231                    | 127                     | 1.39    | .164    | 3.93        | .62       | 3.83         | .61        | 1-5            |
|                   | CD       | 231                    | 127                     | 1.13    | .260    | 4.19        | .69       | 4.10         | .64        | 1-5            |
|                   | FBL      | 231                    | 127                     | .53     | .594    | 2.42        | .95       | 2.36         | .96        | 1-5            |
|                   | AUT      | 231                    | 127                     | -.18    | .858    | 3.74        | .85       | 3.76         | .77        | 1-5            |
|                   | PT       | 231                    | 127                     | -.34    | .737    | 1.77        | .76       | 1.80         | .77        | 1-5            |
|                   | OS       | 231                    | 127                     | 3.47    | .001    | 2.76        | .80       | 2.46         | .74        | 1-5            |
|                   | WO       | 231                    | 127                     | 3.22    | .001    | 3.29        | .93       | 2.99         | .78        | 1-5            |
|                   | IP       | 231                    | 127                     | 1.75    | .081    | 2.77        | 1.00      | 2.58         | .94        | 1-5            |
|                   | SSL      | 231                    | 127                     | -2.83   | .005    | 2.66        | .79       | 2.91         | .84        | 1-5            |
|                   | SSC      | 231                    | 127                     | .31     | .754    | 4.20        | .63       | 4.18         | .67        | 1-5            |
|                   | SSP      | 231                    | 127                     | -.18    | .854    | 4.34        | .74       | 4.36         | .68        | 1-5            |
|                   | SST      | 231                    | 127                     | -1.74   | .083    | 3.43        | .54       | 3.54         | .63        | 1-5            |
|                   | SS       | 281                    | 124                     | -1.44   | .151    | 3.83        | .56       | 3.92         | .63        | 1-5            |
|                   | Variable | Sample size<br>pre (N) | Sample size<br>peri (N) | T-value | p-value | Mean<br>pre | SD<br>pre | Mean<br>peri | SD<br>peri | Scale<br>range |
| <b>Year<br/>2</b> | PWB      | 73                     | 121                     | -.49    | .627    | 3.89        | .42       | 3.92         | .44        | 1-5            |
|                   | SWB      | 73                     | 121                     | -1.20   | .232    | 3.82        | .79       | 3.95         | .74        | 1-5            |
|                   | CIT      | 73                     | 121                     | -.71    | .478    | 3.88        | .45       | 3.93         | .47        | 1-5            |
|                   | EE       | 76                     | 121                     | 2.11    | .036    | 3.02        | 1.15      | 2.71         | .89        | 0-6            |
|                   | SA       | 78                     | 121                     | -.90    | .367    | 3.87        | .60       | 3.95         | .54        | 1-5            |
|                   | CD       | 78                     | 121                     | 3.04    | .003    | 4.22        | .66       | 3.90         | .77        | 1-5            |
|                   | FBL      | 78                     | 121                     | -.97    | .334    | 2.17        | .87       | 2.29         | .91        | 1-5            |
|                   | AUT      | 78                     | 121                     | -2.21   | .029    | 3.49        | .94       | 3.77         | .78        | 1-5            |
|                   | PT       | 78                     | 121                     | -2.76   | .006    | 1.54        | .78       | 1.85         | .75        | 1-5            |
|                   | OS       | 78                     | 121                     | 4.82    | < .001  | 3.20        | .74       | 2.66         | .79        | 1-5            |
|                   | WO       | 78                     | 121                     | 5.70    | < .001  | 3.62        | .91       | 2.88         | .88        | 1-5            |
|                   | IP       | 78                     | 121                     | 3.46    | .001    | 3.15        | .85       | 2.69         | .95        | 1-5            |
|                   | SSL      | 78                     | 121                     | -3.78   | < .001  | 2.32        | .88       | 2.77         | .8         | 1-5            |
|                   | SSC      | 78                     | 121                     | 1.39    | .167    | 4.16        | .77       | 4.00         | .83        | 1-5            |
|                   | SSP      | 78                     | 121                     | .14     | .886    | 4.28        | .82       | 4.26         | .73        | 1-5            |
|                   | SST      | 78                     | 121                     | -1.56   | .121    | 3.24        | .64       | 3.39         | .66        | 1-5            |
|                   | SS       | 98                     | 121                     | -3.99   | < .001  | 3.53        | .54       | 3.82         | .55        | 1-5            |
|                   |          | Sample size<br>pre (N) | Sample size<br>peri (N) | T-value | p-value | Mean<br>pre | SD<br>pre | Mean<br>peri | SD<br>peri | Scale<br>range |
| <b>Year<br/>3</b> | PWB      | 40                     | 68                      | -.20    | .843    | 3.86        | .47       | 3.88         | .38        | 1-5            |
|                   | SWB      | 40                     | 68                      | .10     | .921    | 3.79        | .76       | 3.78         | .76        | 1-5            |
|                   | CIT      | 40                     | 68                      | -.14    | .893    | 3.85        | .48       | 3.86         | .41        | 1-5            |
|                   | EE       | 41                     | 62                      | 1.93    | .056    | 2.98        | 1.06      | 2.52         | 1.23       | 0-6            |
|                   | SA       | 41                     | 66                      | -1.06   | .293    | 3.82        | .64       | 3.96         | .68        | 1-5            |
|                   | CD       | 41                     | 66                      | -.12    | .904    | 3.87        | .82       | 3.89         | .77        | 1-5            |
|                   | FBL      | 41                     | 66                      | 1.09    | .276    | 2.33        | .89       | 2.14         | .91        | 1-5            |
|                   | AUT      | 41                     | 66                      | -.38    | .707    | 3.65        | .90       | 3.71         | .72        | 1-5            |
|                   | PT       | 41                     | 66                      | .45     | .658    | 1.85        | 1.01      | 1.77         | .74        | 1-5            |
|                   | OS       | 41                     | 66                      | 1.49    | .139    | 2.95        | .80       | 2.72         | .79        | 1-5            |
|                   | WO       | 41                     | 66                      | 3.35    | .001    | 3.48        | .84       | 2.86         | .97        | 1-5            |
|                   | IP       | 41                     | 66                      | .30     | .763    | 2.88        | .98       | 2.82         | 1.01       | 1-5            |

|           | SSL      | 41                     | 65                      | -.40    | .691    | 2.53        | .91       | 2.59         | .79        | 1-5            |
|-----------|----------|------------------------|-------------------------|---------|---------|-------------|-----------|--------------|------------|----------------|
|           | SSC      | 41                     | 65                      | -2.20   | .030    | 3.94        | .74       | 4.24         | .62        | 1-5            |
|           | SSP      | 41                     | 65                      | -.36    | .717    | 4.39        | .67       | 4.44         | .72        | 1-5            |
|           | SST      | 41                     | 65                      | -1.57   | .119    | 3.24        | .60       | 3.42         | .56        | 1-5            |
|           | SS       | 57                     | 62                      | -2.45   | .016    | 3.49        | .55       | 3.75         | .62        | 1-5            |
|           | Variable | Sample size<br>pre (N) | Sample size<br>peri (N) | T-value | p-value | Mean<br>pre | SD<br>pre | Mean<br>peri | SD<br>peri | Scale<br>range |
| Year<br>4 | PWB      | 32                     | 37                      | .97     | .335    | 3.92        | .47       | 3.82         | .42        | 1-5            |
|           | SWB      | 32                     | 37                      | -.27    | .786    | 3.83        | .76       | 3.88         | .76        | 1-5            |
|           | CIT      | 32                     | 37                      | .68     | .497    | 3.91        | .50       | 3.83         | .45        | 1-5            |
|           | EE       | 33                     | 35                      | 3.07    | .003    | 3.22        | 1.17      | 2.38         | 1.08       | 0-6            |
|           | SA       | 35                     | 36                      | -.74    | .460    | 3.79        | .81       | 3.92         | .58        | 1-5            |
|           | CD       | 35                     | 36                      | .87     | .385    | 3.75        | .76       | 3.58         | .86        | 1-5            |
|           | FBL      | 35                     | 36                      | -.59    | .559    | 1.98        | .92       | 2.10         | .81        | 1-5            |
|           | AUT      | 35                     | 36                      | .09     | .927    | 3.27        | 1.16      | 3.25         | .78        | 1-5            |
|           | PT       | 35                     | 36                      | -.55    | .581    | 1.80        | .83       | 1.90         | .73        | 1-5            |
|           | OS       | 35                     | 36                      | 3.62    | .001    | 3.29        | .85       | 2.56         | .86        | 1-5            |
|           | WO       | 35                     | 36                      | 2.43    | .017    | 3.32        | 1.07      | 2.75         | .9         | 1-5            |
|           | IP       | 35                     | 36                      | 2.35    | .021    | 3.19        | 1.02      | 2.64         | .96        | 1-5            |
|           | SSL      | 35                     | 36                      | -1.77   | .081    | 2.49        | .84       | 2.81         | .67        | 1-5            |
|           | SSC      | 35                     | 36                      | -.52    | .601    | 4.15        | .62       | 4.23         | .65        | 1-5            |
|           | SSP      | 35                     | 36                      | 1.19    | .239    | 4.46        | .69       | 4.24         | .84        | 1-5            |
|           | SST      | 35                     | 36                      | -1.67   | .099    | 3.32        | .54       | 3.52         | .47        | 1-5            |
|           | SS       | 37                     | 35                      | -1.60   | .114    | 3.32        | .61       | 3.55         | .63        | 1-5            |
|           | Variable | Sample size<br>pre (N) | Sample size<br>peri (N) | T-value | p-value | Mean<br>pre | SD<br>pre | Mean<br>peri | SD<br>peri | Scale<br>range |
| Year<br>5 | PWB      | 11                     | 13                      | 1.32    | .202    | 3.97        | .23       | 3.79         | .39        | 1-5            |
|           | SWB      | 11                     | 13                      | .63     | .536    | 3.92        | .61       | 3.74         | .79        | 1-5            |
|           | CIT      | 11                     | 13                      | 1.16    | .259    | 3.96        | .27       | 3.78         | .45        | 1-5            |
|           | EE       | 13                     | 11                      | -.53    | .599    | 2.72        | 1.34      | 2.98         | .97        | 0-6            |
|           | SA       | 14                     | 12                      | -.43    | .668    | 3.59        | .84       | 3.73         | .79        | 1-5            |
|           | CD       | 14                     | 12                      | -1.31   | .202    | 3.48        | .93       | 3.92         | .75        | 1-5            |
|           | FBL      | 14                     | 12                      | -.01    | .991    | 2.36        | 1.07      | 2.36         | .59        | 1-5            |
|           | AUT      | 14                     | 12                      | -1.56   | .134    | 3.05        | 1.28      | 3.67         | .66        | 1-5            |
|           | PT       | 14                     | 12                      | -1.28   | .214    | 1.75        | .94       | 2.17         | .69        | 1-5            |
|           | OS       | 14                     | 12                      | .50     | .621    | 3.01        | .81       | 2.87         | .68        | 1-5            |
|           | WO       | 14                     | 12                      | .80     | .434    | 3.04        | 1.13      | 2.71         | .93        | 1-5            |
|           | IP       | 14                     | 12                      | 2.75    | .012    | 3.43        | 1.02      | 2.56         | .56        | 1-5            |
|           | SSL      | 14                     | 12                      | -.80    | .433    | 2.05        | .75       | 2.25         | .49        | 1-5            |
|           | SSC      | 14                     | 12                      | .76     | .457    | 4.19        | .86       | 3.97         | .54        | 1-5            |
|           | SSP      | 14                     | 12                      | .43     | .668    | 4.45        | .79       | 4.33         | .57        | 1-5            |
|           | SST      | 14                     | 12                      | .04     | .970    | 3.12        | .62       | 3.11         | .42        | 1-5            |
|           | SS       | 17                     | 11                      | -1.26   | .217    | 3.11        | .54       | 3.35         | .4         | 1-5            |

PWB = psychological well-being, SWB = subjective well-being, CIT = thriving, EE = emotional exhaustion, SA = skill adequacy, CD = cognitive demands, FBL = feedback of lecturers, AUT = autonomy, PT = participation, OS = organizational stressors, WO = work overload, IP = information problems, SSL = social support of lecturers, SSC = social support of colleagues, SSP = social support private, SST = social support total, SS = study satisfaction

**Table S4.** Differences between study years in the COVID-specific questions.

| Variable | (IV) How much impact do the pandemic containment measures have on your student life? |                 |              |          |         | (V) I feel sufficiently informed about the Corona prevention measures at my university. |                 |              |          |         | (X) Due to the lack of or limited attendance during my studies, I find it difficult to make new friends. |                 |              |          |         |
|----------|--------------------------------------------------------------------------------------|-----------------|--------------|----------|---------|-----------------------------------------------------------------------------------------|-----------------|--------------|----------|---------|----------------------------------------------------------------------------------------------------------|-----------------|--------------|----------|---------|
|          | Compared study years                                                                 | Sample Size (N) | Middle ranks | U-value  | p-value | Compared study years                                                                    | Sample Size (N) | Middle ranks | U-value  | p-value | Compared study years                                                                                     | Sample Size (N) | Middle ranks | U-value  | p-value |
|          | 1 vs. 2                                                                              | 1: 147          | 12.46        | 6829.500 | <.001   | 1 vs. 2                                                                                 | 1: 146          | 145.59       | 8455.500 | .083    | 1 vs. 2                                                                                                  | 1: 142          | 125.54       | 7673.000 | .012    |
|          |                                                                                      | 2: 130          | 159.97       |          |         |                                                                                         | 2: 130          | 13.54        |          |         |                                                                                                          | 2: 130          | 148.48       |          |         |
|          | 1 vs. 3                                                                              | 1: 147          | 107.46       | 4918.000 | <.001   | 1 vs. 3                                                                                 | 1: 146          | 129.36       | 513.500  | .001    | 1 vs. 3                                                                                                  | 1: 142          | 112.18       | 5777.000 | .199    |
|          |                                                                                      | 3: 91           | 138.96       |          |         |                                                                                         | 3: 91           | 102.38       |          |         |                                                                                                          | 3: 90           | 123.31       |          |         |
|          | 1 vs. 4                                                                              | 1: 147          | 91.88        | 2628.000 | <.001   | 1 vs. 4                                                                                 | 1: 146          | 101.90       | 3592.000 | .387    | 1 vs. 4                                                                                                  | 1: 142          | 91.04        | 2774.000 | .006    |
|          |                                                                                      | 4: 53           | 124.42       |          |         |                                                                                         | 4: 53           | 94.77        |          |         |                                                                                                          | 4: 52           | 115.15       |          |         |
|          | 1 vs. 5                                                                              | 1: 147          | 88.12        | 2075.000 | .113    | 1 vs. 5                                                                                 | 1: 146          | 94.07        | 1961.500 | .034    | 1 vs. 5                                                                                                  | 1: 142          | 82.60        | 1575.5   | .001    |
|          |                                                                                      | 5: 34           | 103.47       |          |         |                                                                                         | 5: 34           | 75.19        |          |         |                                                                                                          | 5: 34           | 113.16       |          |         |
|          | 1 vs. 6                                                                              | 1: 147          | 83.37        | 1378.000 | .144    | 1 vs. 6                                                                                 | 1: 146          | 87.23        | 1353.000 | .094    | 1 vs. 6                                                                                                  | 1: 142          | 82.21        | 1521.500 | .838    |
|          |                                                                                      | 6: 23           | 99.09        |          |         |                                                                                         | 6: 23           | 7.83         |          |         |                                                                                                          | 6: 22           | 84.34        |          |         |
|          | 2 vs. 3                                                                              | 2: 130          | 112.15       | 5765.500 | .743    | 2 vs. 3                                                                                 | 2: 130          | 116.68       | 5176.000 | .086    | 2 vs. 3                                                                                                  | 2: 130          | 113.25       | 5493.000 | .422    |
|          |                                                                                      | 3: 91           | 109.36       |          |         |                                                                                         | 3: 91           | 102.88       |          |         |                                                                                                          | 3: 90           | 106.53       |          |         |
|          | 2 vs. 4                                                                              | 2: 130          | 9.35         | 323.500  | .497    | 2 vs. 4                                                                                 | 2: 130          | 9.99         | 3313.500 | .657    | 2 vs. 4                                                                                                  | 2: 130          | 89.67        | 3142.5   | .438    |
|          |                                                                                      | 4: 53           | 96.05        |          |         |                                                                                         | 4: 53           | 94.48        |          |         |                                                                                                          | 4: 52           | 96.07        |          |         |
|          | 2 vs. 5                                                                              | 2: 130          | 84.95        | 1891.000 | .183    | 2 vs. 5                                                                                 | 2: 130          | 84.38        | 1965.500 | .279    | 2 vs. 5                                                                                                  | 2: 130          | 79.91        | 1873.000 | .152    |
|          |                                                                                      | 5: 34           | 73.12        |          |         |                                                                                         | 5: 34           | 75.31        |          |         |                                                                                                          | 5: 34           | 92.41        |          |         |
|          | 2 vs. 6                                                                              | 2: 130          | 77.27        | 146.500  | .857    | 2 vs. 6                                                                                 | 2: 130          | 78.36        | 1318.500 | .327    | 2 vs. 6                                                                                                  | 2: 130          | 78.01        | 1233.5   | .283    |
|          |                                                                                      | 6: 23           | 75.50        |          |         |                                                                                         | 6: 23           | 69.33        |          |         |                                                                                                          | 6: 22           | 67.57        |          |         |
|          | 3 vs. 4                                                                              | 3: 91           | 7.25         | 2206.500 | .382    | 3 vs. 4                                                                                 | 3: 91           | 68.21        | 2021.000 | .079    | 3 vs. 4                                                                                                  | 3: 90           | 68.16        | 2039.000 | .183    |
|          |                                                                                      | 4: 53           | 76.37        |          |         |                                                                                         | 4: 53           | 79.87        |          |         |                                                                                                          | 4: 52           | 77.29        |          |         |
|          | 3 vs. 5                                                                              | 3: 91           | 64.99        | 1366.000 | .302    | 3 vs. 5                                                                                 | 3: 91           | 62.84        | 1532.000 | .929    | 3 vs. 5                                                                                                  | 3: 90           | 58.91        | 1207.000 | .059    |
|          |                                                                                      | 5: 34           | 57.68        |          |         |                                                                                         | 5: 34           | 63.44        |          |         |                                                                                                          | 5: 34           | 72.00        |          |         |
|          | 3 vs. 6                                                                              | 3: 91           | 57.64        | 1033.5   | .925    | 3 vs. 6                                                                                 | 3: 91           | 57.76        | 1022.5   | .857    | 3 vs. 6                                                                                                  | 3: 90           | 57.31        | 917.000  | .579    |
|          |                                                                                      | 6: 23           | 56.93        |          |         |                                                                                         | 6: 23           | 56.46        |          |         |                                                                                                          | 6: 22           | 53.18        |          |         |
|          | 4 vs. 5                                                                              | 4: 53           | 47.42        | 72.000   | .105    | 4 vs. 5                                                                                 | 4: 53           | 46.49        | 769.000  | .211    | 4 vs. 5                                                                                                  | 4: 52           | 42.18        | 815.5    | .522    |
|          |                                                                                      | 5: 34           | 38.68        |          |         |                                                                                         | 5: 34           | 4.12         |          |         |                                                                                                          | 5: 34           | 45.51        |          |         |
|          | 4 vs. 6                                                                              | 4: 53           | 39.41        | 561.500  | .577    | 4 vs. 6                                                                                 | 4: 53           | 4.19         | 52.000   | .272    | 4 vs. 6                                                                                                  | 4: 52           | 39.81        | 452.000  | .137    |
|          |                                                                                      | 6: 23           | 36.41        |          |         |                                                                                         | 6: 23           | 34.61        |          |         |                                                                                                          | 6: 22           | 32.05        |          |         |
|          | 5 vs. 6                                                                              | 5: 34           | 28.03        | 358.000  | .583    | 5 vs. 6                                                                                 | 5: 34           | 29.35        | 379.000  | .836    | 5 vs. 6                                                                                                  | 5: 34           | 31.72        | 264.500  | .053    |
|          |                                                                                      | 6: 23           | 3.43         |          |         |                                                                                         | 6: 23           | 28.48        |          |         |                                                                                                          | 6: 22           | 23.52        |          |         |

**Table S5.** Differences in the longitudinal sample.

| <b>Variable Name</b> | <b>Sample size (N)</b> | <b>T - value</b> | <b>p - value</b> |
|----------------------|------------------------|------------------|------------------|
| CIT_pre vs. CIT_peri | 28                     | 1.60             | .121             |
| PWB_pre vs. PWB_peri | 28                     | 2.02             | .054             |
| SWB_pre vs. SWB_pre  | 28                     | -.26             | .795             |
| EE_pre vs. EE_peri   | 30                     | .47              | .643             |
| SA_pre vs. SA_peri   | 32                     | -.66             | .511             |
| CD_pre vs. CD_peri   | 32                     | 1.50             | .143             |
| FBL_pre vs. FBL_peri | 32                     | 1.20             | .238             |
| AUT_pre vs. AUT_peri | 32                     | 1.39             | .175             |
| PT_pre vs. PT_peri   | 32                     | 1.16             | .255             |
| OS_pre vs. OS_peri   | 32                     | 1.52             | .139             |
| WO_pre vs. WO_peri   | 32                     | 3.15             | .004             |
| IP_pre vs. IP_peri   | 32                     | 1.63             | .112             |
| SSL_pre vs. SSL_peri | 32                     | .78              | .440             |
| SSC_pre vs. SSC_peri | 32                     | .88              | .384             |
| SSP_pre vs. SSP_peri | 32                     | .44              | .665             |
| SST_pre vs. SST_peri | 32                     | 1.03             | .313             |
| SS_pre vs. SS_peri   | 50                     | 2.65             | .011             |

Pre= before pandemic (2017-2020), peri = during pandemic (2022); CIT = thriving, PWB = psychological well-being, SWB = subjective well-being, EE = emotional exhaustion, SA = skill adequacy, CD = cognitive demands, FBL = feedback of lecturers, AUT = autonomy, PT = participation, OS = organizational stressors, WO = work overload, IP = information problems, SSL = social support of lecturers, SSC = social support of colleagues, SSP = social support private, SST = social support total, SS = study satisfaction
